# Supplementary material
Source: PubMed Central journal article supplement (PMC3427940)
Supplement: NIHMS273944-supplement-1_si_001.pdf [file NIHMS273944-supplement-1_si_001.pdf]

## Supplemental Material

**Table S1. *In meso* crystallization conditions in three hosting MAGs and gramicidin solubility in the corresponding precipitant solutions.**

|                            | 7.7 MAG                 | 8.8 MAG                               | 9.9 MAG             |
|----------------------------|-------------------------|---------------------------------------|---------------------|
| Precipitant <sup>a</sup>   | 25 % PEG 3.35k          | 30 % PEG 8k                           | 20 % PEG 6k         |
| Salt                       | 0.2 M LiSO <sub>4</sub> | 0.2 M NH <sub>4</sub> SO <sub>4</sub> | -                   |
| Buffer                     | 0.1 M Bis-Tris pH 5.5   |                                       | 0.1 M Bicine pH 9.0 |
| gD solubility <sup>b</sup> | 0.04 g/L, 21 μM         | 0.10 g/L, 53 μM                       | 0.02 g/L, 11 μM     |

<sup>a</sup> Percentage is reported as weight by volume. <sup>b</sup> Gramicidin solubility in precipitant solutions was determined in the absence of lipid.

**Table S2 – Ramachandran analysis.<sup>a</sup>**

| Structure | Residues in favoured regions, Number (%) | Residues in allowed regions, Number (%) | Residues in outlier regions, Number (%) |
|-----------|------------------------------------------|-----------------------------------------|-----------------------------------------|
| 7.7 MAG   | 68 (87.2)                                | 10 (12.8)                               | 0 (0)                                   |
| 8.8 MAG   | 69 (88.5)                                | 9 (11.5)                                | 0 (0)                                   |
| 9.9 MAG   | 68 (87.2)                                | 10 (12.8)                               | 0 (0)                                   |

<sup>a</sup> The  $\phi$  and  $\psi$  torsion angles for all amino acids were calculated using RAMPAGE.<sup>1</sup> The torsion angle sign for the D-amino acids was reversed, as described by Glowka et al.,<sup>2</sup> moving them into the most favoured region of the Ramachandran plot. All glycines are in glycine allowed regions.

**Table S3. Possible scenarios for the way in which gramicidin crystallizes in mesophases formed with different MAGs.**

| Steps in <i>in meso</i> crystallization | Scenario / conformation <sup>a</sup> |       |       |       |       |
|-----------------------------------------|--------------------------------------|-------|-------|-------|-------|
|                                         | 1                                    | 2     | 3     | 4     | 5     |
| Solubilization/Reconstitution           | DSDH                                 | MIXED | MIXED | MIXED | MIXED |
| In mesophase                            | DSDH                                 | DSDH  | MIXED | MIXED | MIXED |
| In mesophase + precipitant              | DSDH                                 | DSDH  | DSDH  | MIXED | MIXED |
| Phase separation                        | DSDH                                 | DSDH  | DSDH  | DSDH  | MIXED |
| Final crystal                           | DSDH                                 | DSDH  | DSDH  | DSDH  | DSDH  |

<sup>a</sup> DSDH refers to the specific double stranded, intertwined double helix conformation of gramicidin that appears in final crystals. MIXED indicates that gramicidin can adopt different conformations.

1. Lovell, S. C.; Davis, I. W.; Arendall, W. B., 3rd; de Bakker, P. I.; Word, J. M.; Prisant, M. G.; Richardson, J. S.; Richardson, D. C. *Proteins* **2003**, *50*, 437-450.
2. Glowka, M. L.; Olczak, A.; Bojarska, J.; Szczesio, M.; Duax, W. L.; Burkhart, B. M.; Pangborn, W. A.; Langs, D. A.; Wawrzak, Z. *Acta Crystallogr. Sect. D* **2005**, *61*, 433-441.
